# Supplementary material for: Raman microspectroscopy of human aortic valves: investigation of the local and global biochemical changes associated with calcification in aortic stenosis
Source: Royal Society of Chemistry journal article supplement (doi:10.1039/c4an01856g), 2014-12-16
Supplement: c4an01856g1.pdf [file c4an01856g1.pdf]

## Supplementary Materials

### *Raman microspectroscopy of human aortic valves: investigation of local and global biochemical changes associated with calcification in the aortic stenosis*

K. Czamara, J. Natorska, P. Kapusta, M. Baranska and A. Kaczor\*

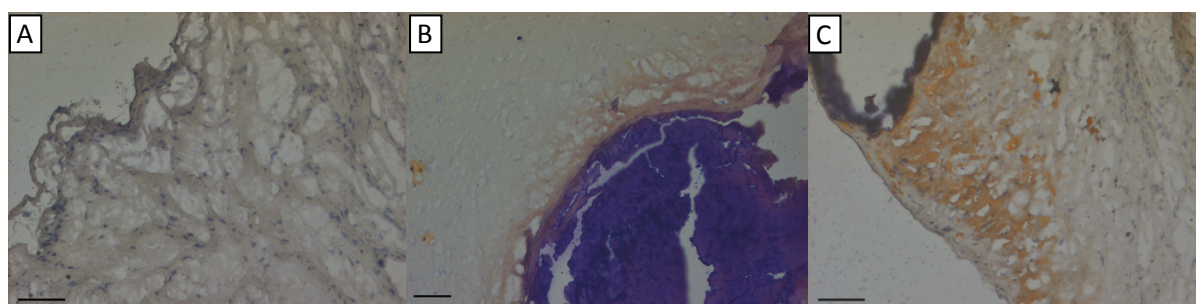

**Fig. S1.** Representative image of Sudan III staining showing microscopic localization of lipids (red) [counterstained with hematoxyline (dark purple): (A) healthy aortic valve and (B,C) calcified aortic valves]. The black bar indicates 100  $\mu\text{m}$ .
